# Supplementary material for: Circulating serum HBsAg level is a biomarker for HBV-specific T and B cell responses in chronic hepatitis B patients
Source: PubMed Central journal article supplement (PMC7000714; doi:10.1038/s41598-020-58870-2), 2020-02-04

Supplementary Fig S1

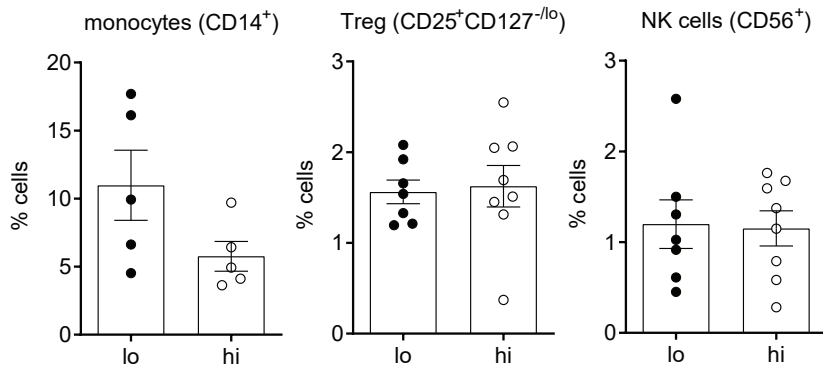

Supplementary Fig S2-1

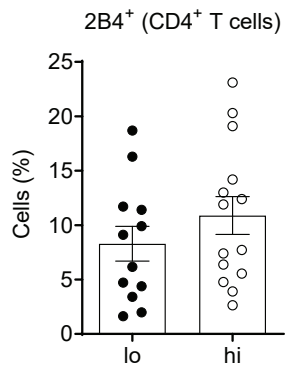

S2-2

A

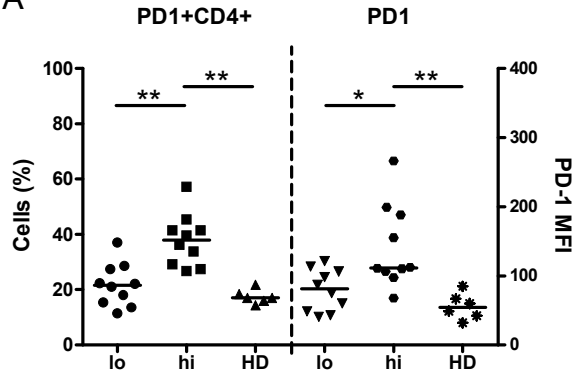

B

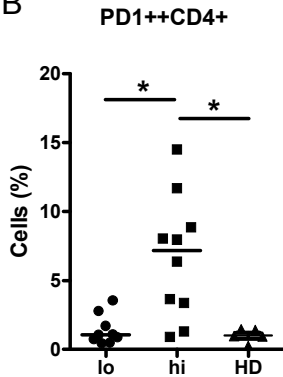

C

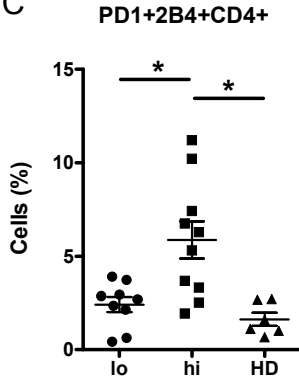

Supplementary Fig S2-3

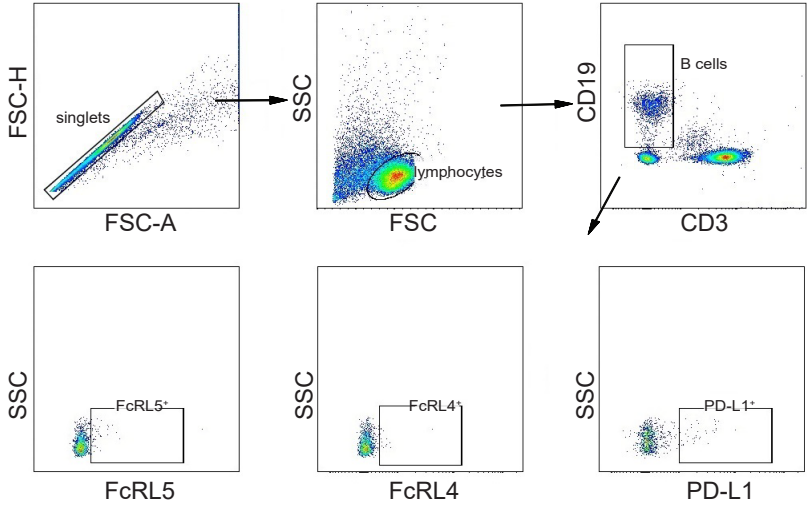

Supplemental Figure S3

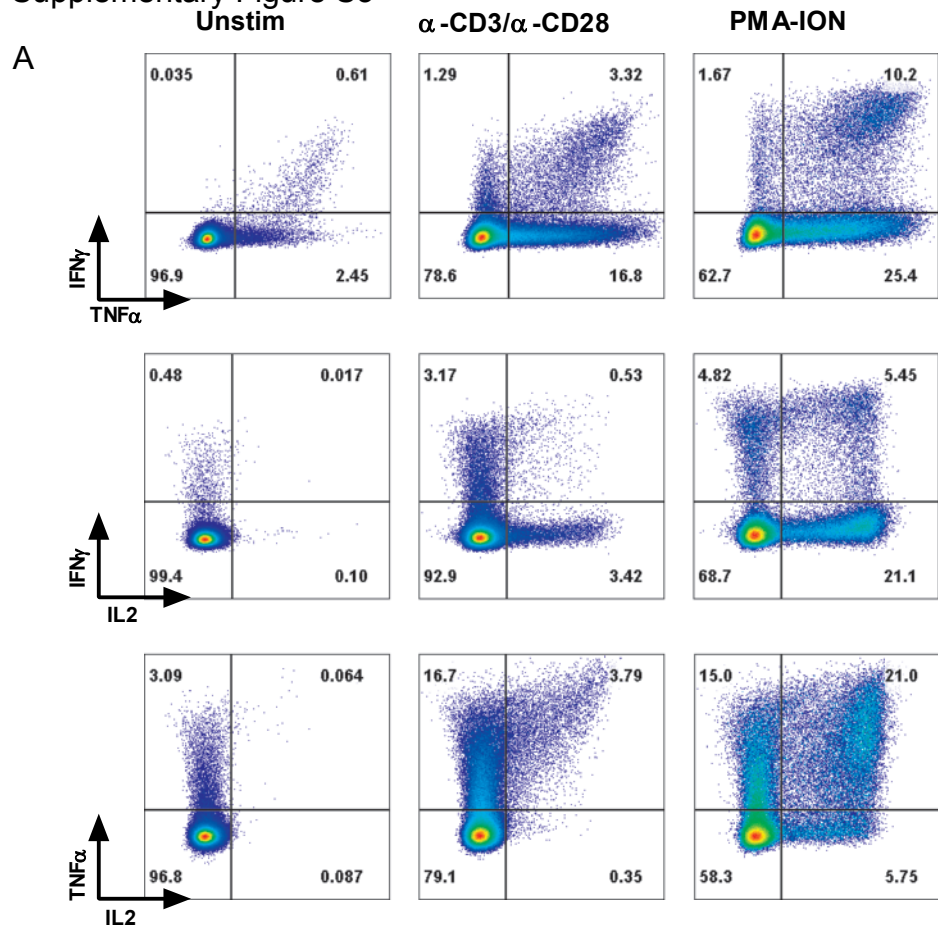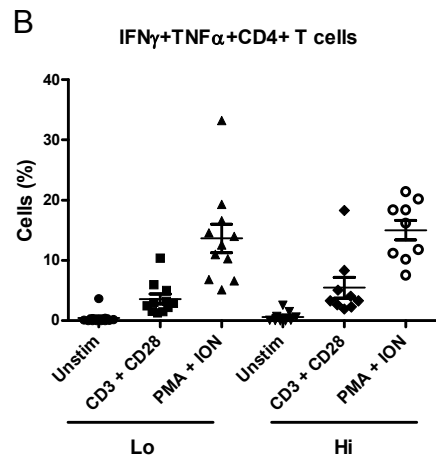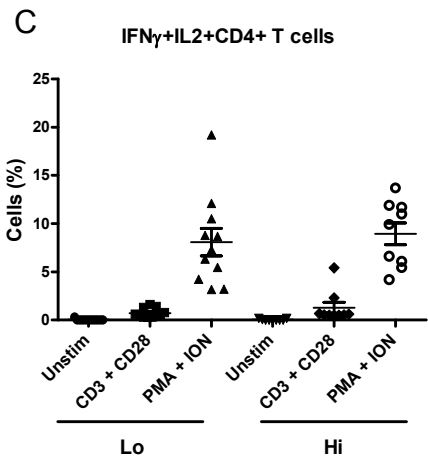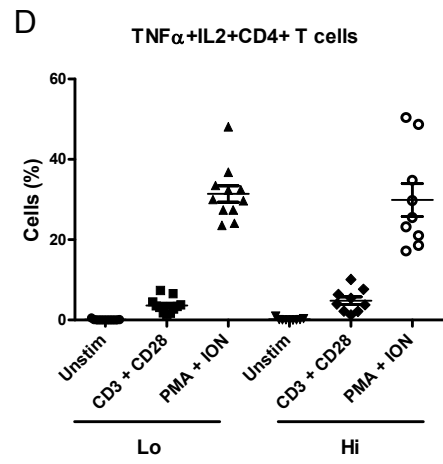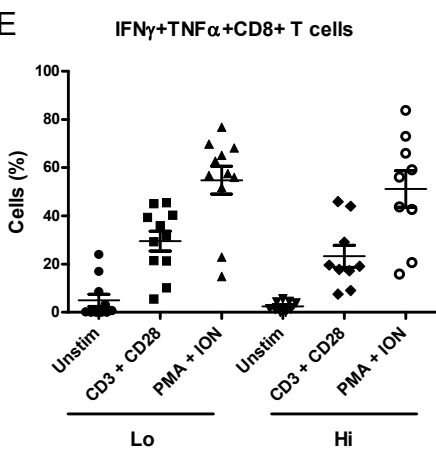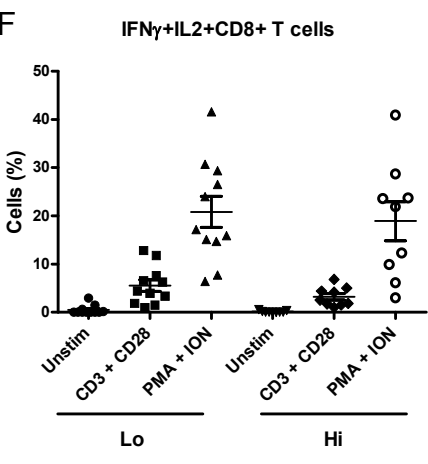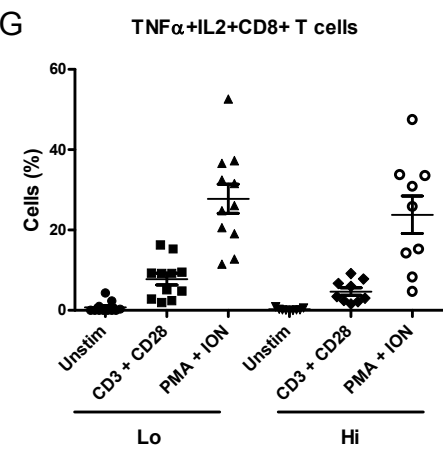

A

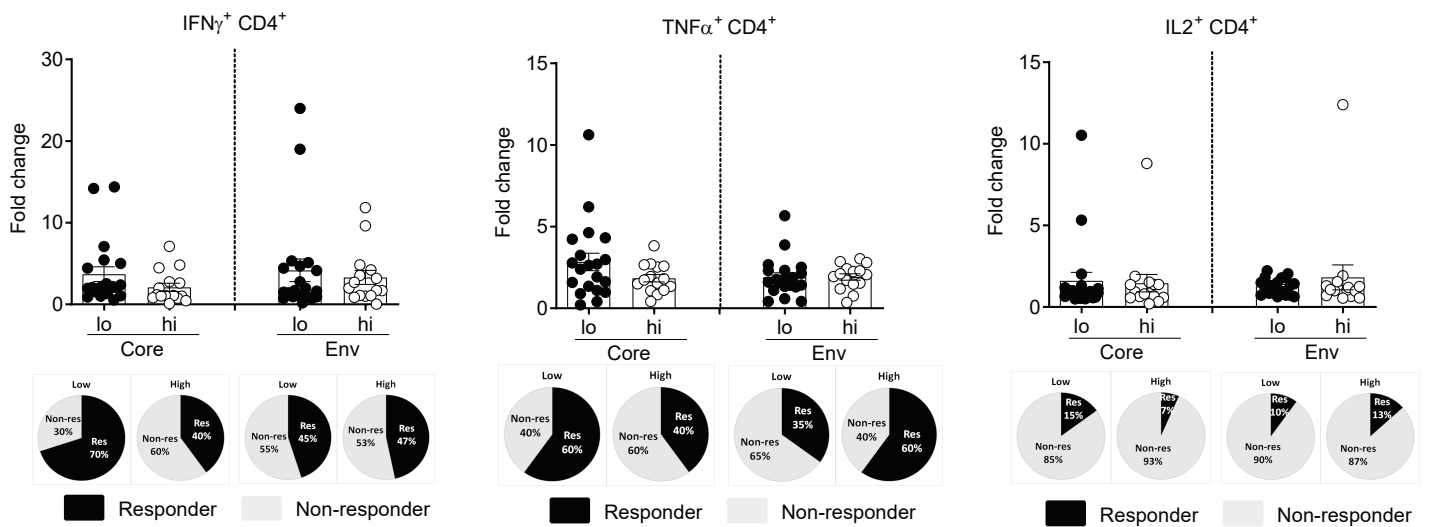

B

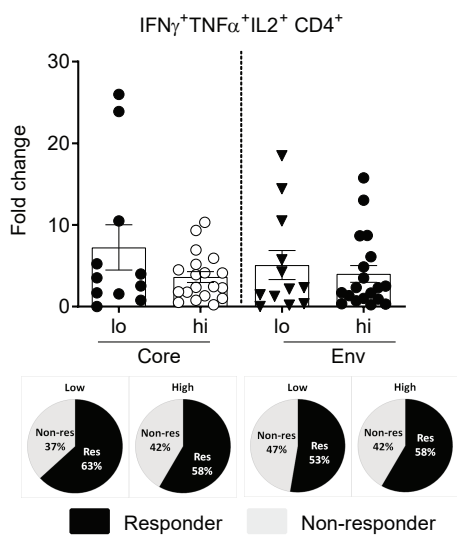

C

cytokine<sup>+</sup> T cells (CD4<sup>+</sup>)

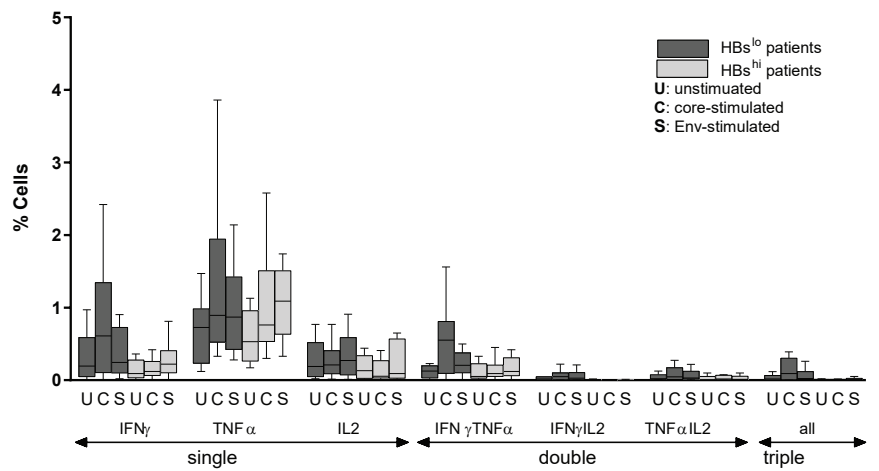

D

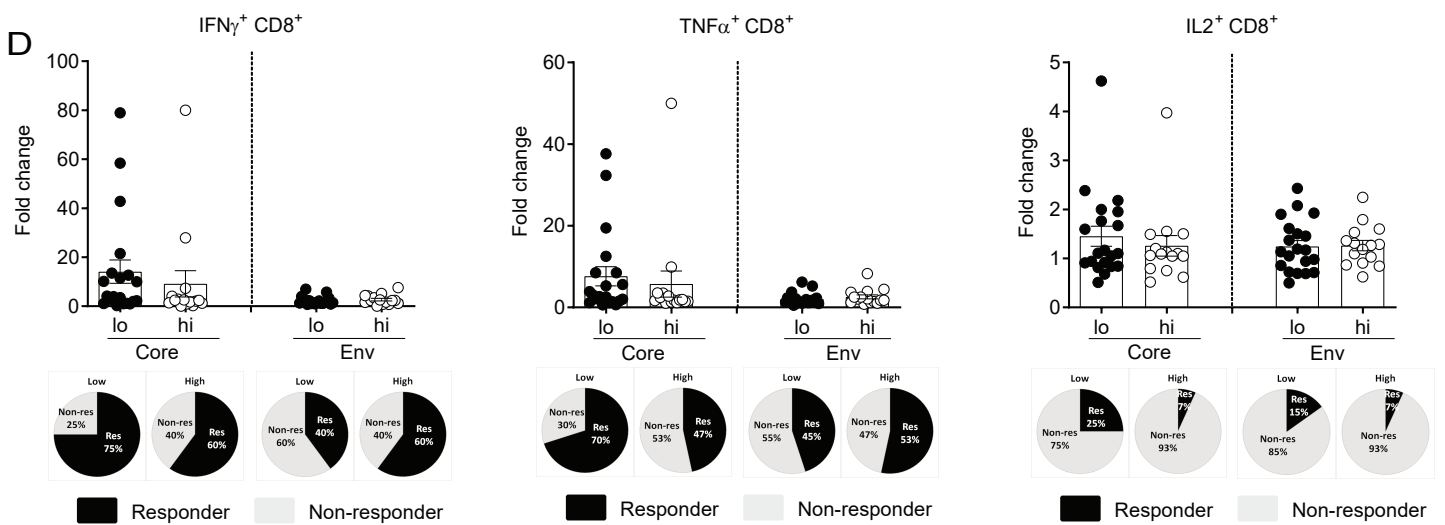

# Supplementary Figure S5

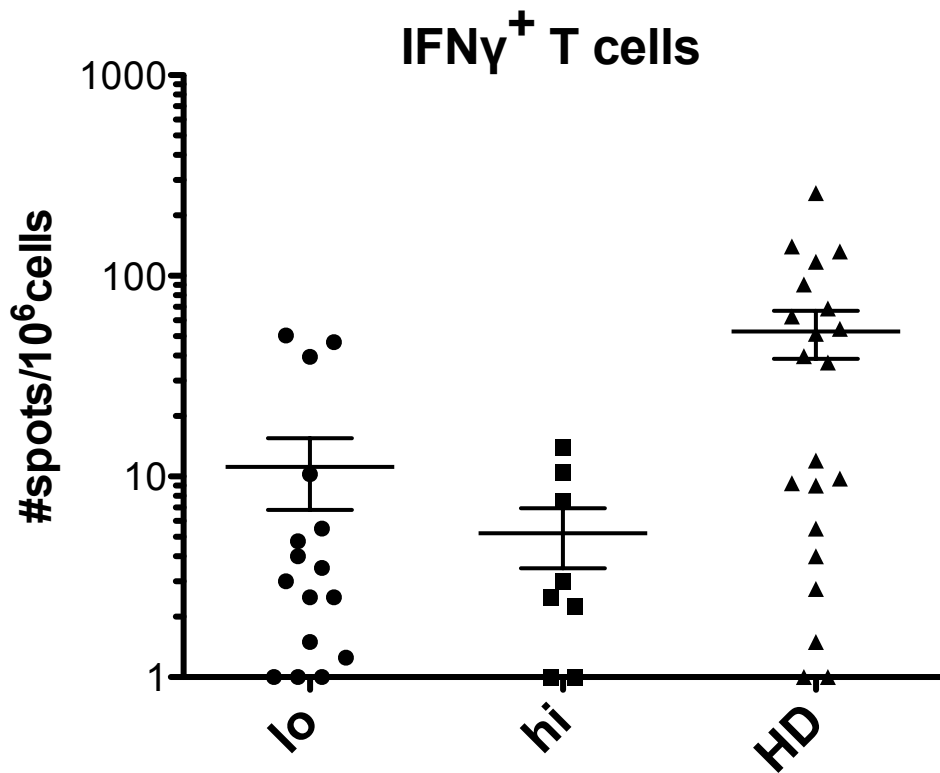

Supplement: 41598_2020_58870_MOESM1_ESM.pdf [file 41598_2020_58870_MOESM1_ESM.pdf]
